# Supplementary material for: Lattice strain-induced high-performance low-operating-voltage organic field-effect transistors by solution-sheared organic single crystal
Source: Royal Society of Chemistry journal article supplement (doi:10.1039/d3tc04755e), 2024-01-01
Supplement: d3tc04755e1.pdf [file d3tc04755e1.pdf]

## Supporting Information

Lattice Strain-Induced High-Performance Low-Operating-Voltage Organic Field-Effect Transistors by Solution-Sheared Organic Single Crystal

Bowen Geng <sup>ab</sup>, Feng Zhang <sup>ab</sup>, Congcong Huang <sup>ab</sup>, Lihua He <sup>ab</sup>, Chengtai Li <sup>ab</sup>, Shuming Duan <sup>c\*</sup>,  
Xiaochen Ren <sup>ab\*</sup> and Wenping Hu <sup>ab\*</sup>

a. Key Laboratory of Organic Integrated Circuits, Ministry of Education & Tianjin Key Laboratory of Molecular Optoelectronic Sciences, Department of Chemistry, School of Science, Tianjin University, Tianjin 300072, China

b. Collaborative Innovation Center of Chemical Science and Engineering (Tianjin), Tianjin 300072, China

c. Joint School of National University of Singapore and Tianjin University, International Campus of Tianjin University, Binhai New City, Fuzhou, 350207, China

\* Corresponding author (email: [smduan@tjufz.org.cn](mailto:smduan@tjufz.org.cn), [renxiaochen@tju.edu.cn](mailto:renxiaochen@tju.edu.cn), [huwp@tju.edu.cn](mailto:huwp@tju.edu.cn))

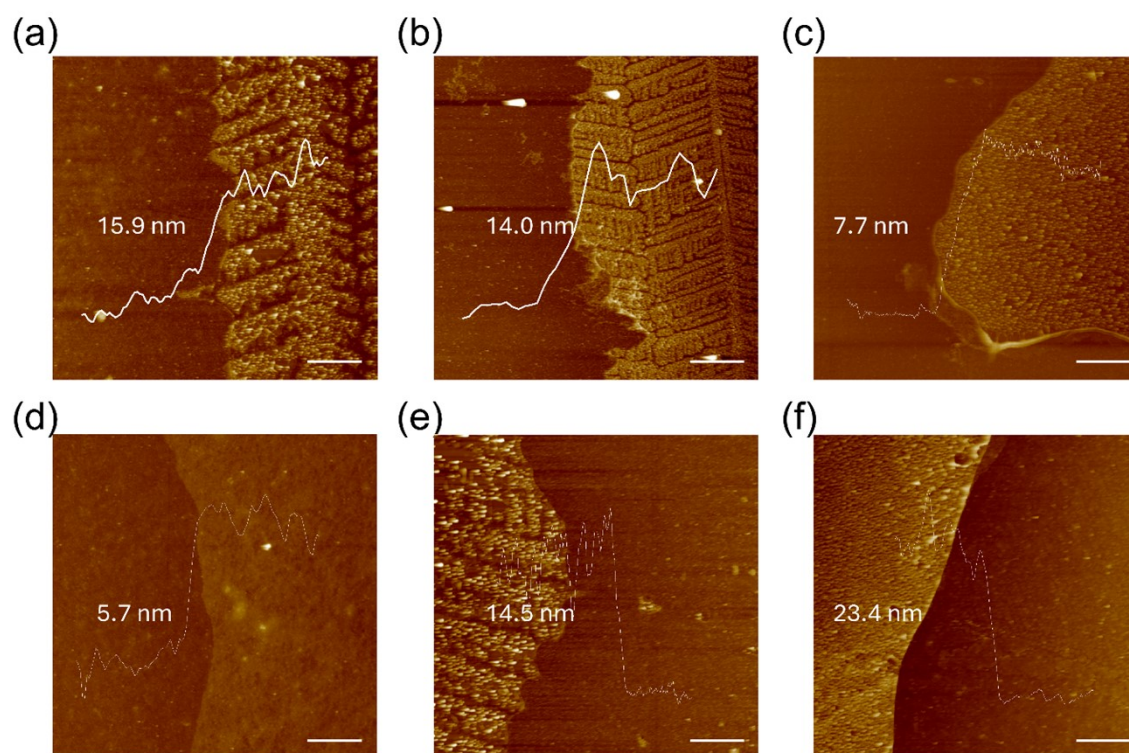

**Figure S1** AFM image of C<sub>8</sub>-BTBT single crystal and PS layer at shear rate of (a) 300  $\mu\text{m s}^{-1}$ , (b) 500  $\mu\text{m s}^{-1}$ , (c) 700  $\mu\text{m s}^{-1}$ , (d) 800  $\mu\text{m s}^{-1}$ , (e) 1000  $\mu\text{m s}^{-1}$ , (f) 1500  $\mu\text{m s}^{-1}$ , scale bar is 1  $\mu\text{m}$ .

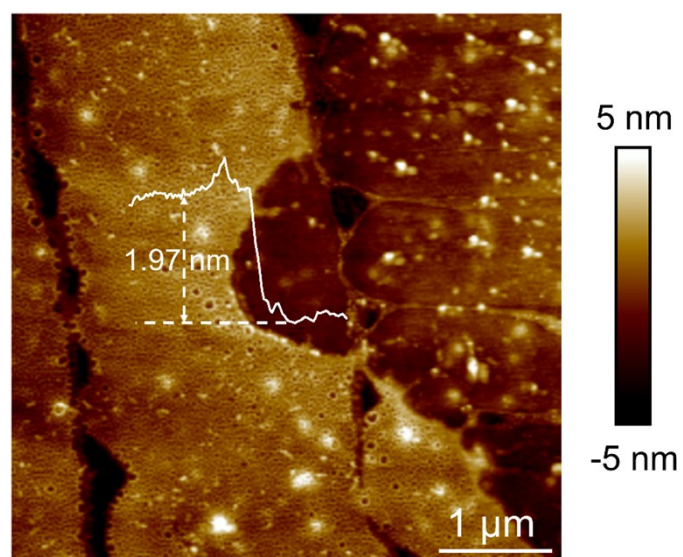

**Figure S2**, AFM image of PS thickness at 700  $\mu\text{m s}^{-1}$ .

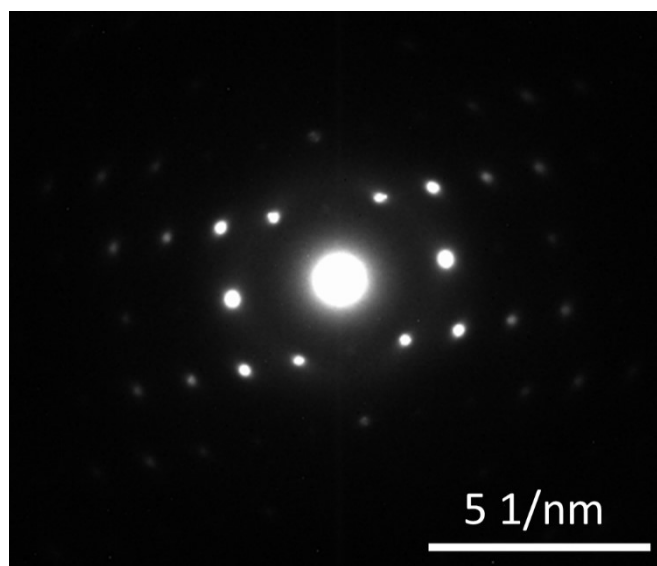

**Figure S3** Selected Area Electron Diffraction (SAED) image of C<sub>8</sub>-BTBT crystal.

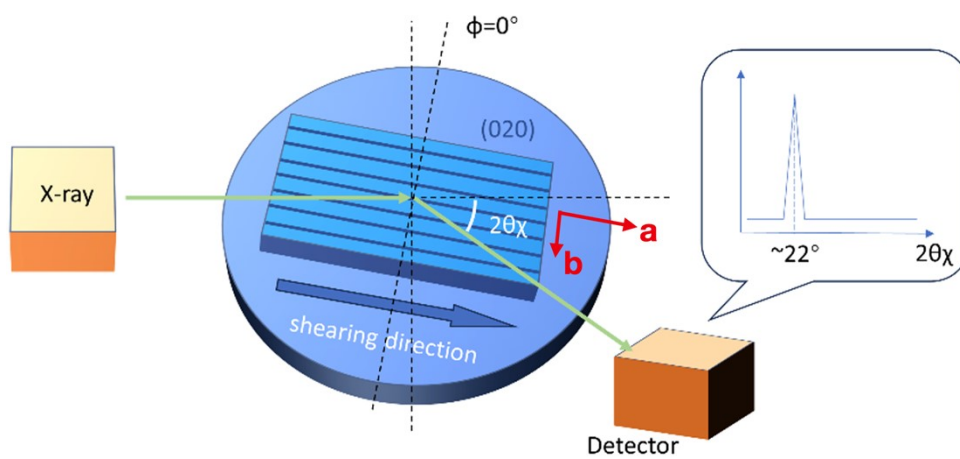

**Figure S4** In-plane XRD measurement setup.

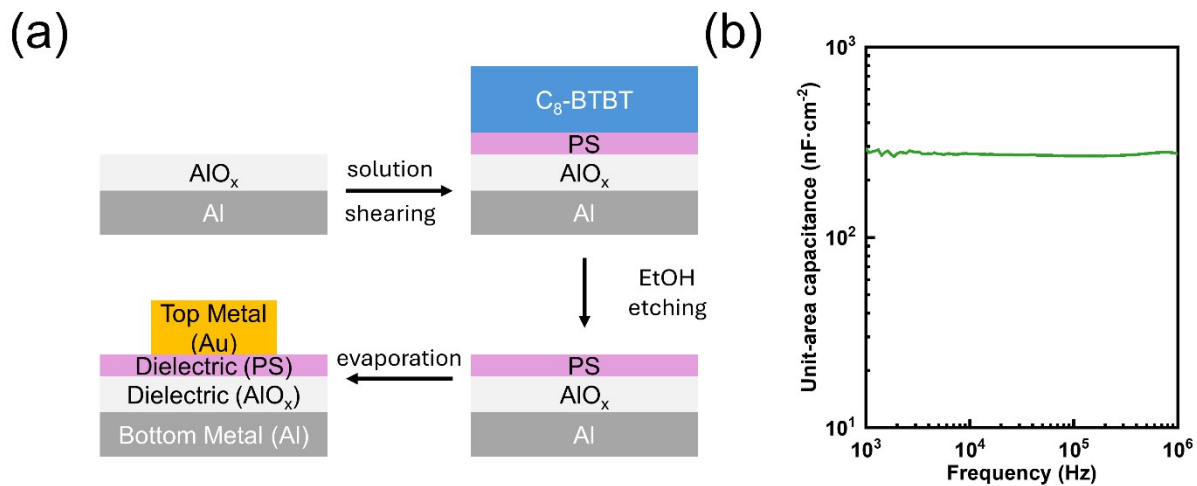

**Figure S5** (a) Diagram image of metal-insulator-metal (MIM) device. (b) Unit-area capacitance of  $\text{AlO}_x/\text{PS}$  dual dielectrics.

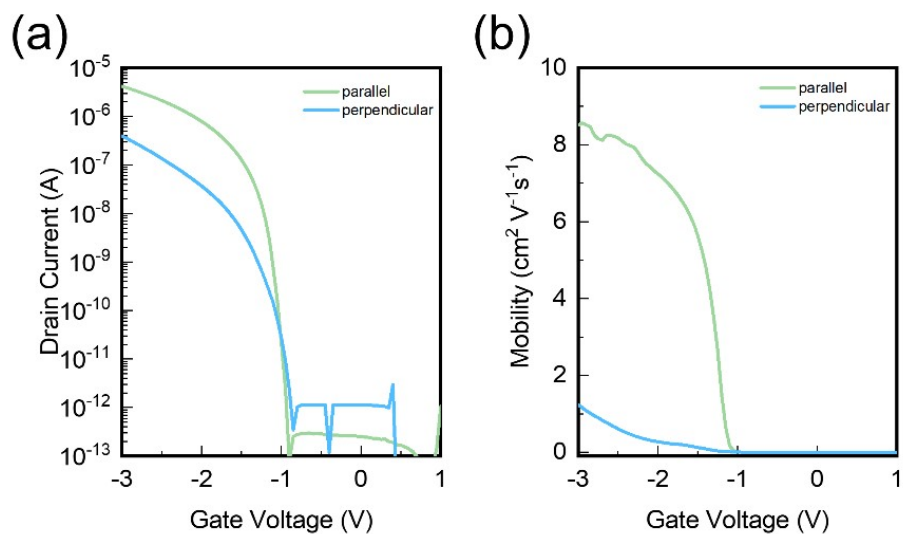

**Figure S6** (a) Transfer I-V curve of parallel and perpendicular channel of OFET under  $700 \mu\text{m s}^{-1}$  shearing speed. (b) Mobility of parallel and perpendicular channel of OFET under  $700 \mu\text{m s}^{-1}$  shearing speed.
